# Supplementary material for: Shell-detachable nanoparticles based on a light-responsive amphiphile for enhanced siRNA delivery
Source: Royal Society of Chemistry journal article supplement (doi:10.1039/c3ra44866e), 2013-11-22
Supplement: c3ra44866e.pdf [file c3ra44866e.pdf]

1 Electronic Supplementary Information for

2 **Shell-detachable nanoparticles based on a light-responsive**  
3 **amphiphile for enhanced siRNA delivery**

4 *Hong-Jun Li, Hong-Xia Wang, Chun-Yang Sun, Jin-Zhi Du\* and Jun Wang\**

5 School of Life Sciences, University of Science and Technology of China, Hefei,  
6 Anhui 230027, P.R. China.

7  
8 **Materials.** Diethylenetriamine (DETA, Sinopharm Chemical Reagent Co., Ltd.,  
9 China) was dried over CaH<sub>2</sub> overnight and distilled before use. Palmitic acid  
10 (Sinopharm Chemical Reagent Co., Ltd., China) was purified by recrystallization  
11 from hot ethanol. Ethyl trifluoroacetate, (3-dimethylaminopropyl) ethyl-  
12 carbodiimidmonohydrochloride (EDC·HCl), di-tert-butylidicarbonate (Boc<sub>2</sub>O) and  
13 sodium borohydride were purchased from Aladdin Industrial Inc. (Shanghai, China)  
14 and used without purification. *N*-Hydroxysuccinimide (NHS) and *N, N'*-  
15 Dicyclohexylcarbodiimide (DCC) were purchased from Shanghai Medpep Co., Ltd.  
16 (Shanghai, China) and used without purification. *N, N'*-Dimethylformamide (DMF),  
17 dichloromethane (DCM) and methanol were dried over CaH<sub>2</sub> overnight and distilled  
18 before use. Tetrahydrofuran (THF) was dried over a Na-K alloy and used just before  
19 use. 2-(4-formyl-2-methoxy-5-nitrophenoxy) acetic acid was synthesized as reported.<sup>1</sup>  
20 4-(dimethylamino)-pyridinium *p*-toluenesulfonate (DPTS) was prepared as previously  
21 reported.<sup>2</sup> FAM-labeled siRNA (FAM-siRNA), siRNA with a scrambled sequence  
22 (si*N.C.*) and siRNA targeting luciferase mRNA (si*Luc*) were obtained from Suzhou  
23 Ribo Life Science Co. (Jiangsu, China). All other chemicals were of reagent grade  
24 and used without further purification.

25 **Characterization.** <sup>1</sup>H NMR spectra were recorded on a Bruker AV400 NMR  
26 spectrometer using CDCl<sub>3</sub> or DMSO-*d*<sub>6</sub> as the solvents. The UV-Vis absorbance

1 change in the solution after UV irradiation ( $\lambda_{\max} = 365 \text{ nm}$ , EXFO Omnicure™1000,  
2 Canada) was measured on a UV-2802 PC (UNICO, China) spectrometer. Dynamic  
3 light scattering (DLS) measurements were performed in aqueous solution using a  
4 Malvern Zetasizer Nano ZS90 with a He-Ne laser (633 nm) and  $90^\circ$  collecting optics.  
5 The data were analyzed by Malvern Dispersion Technology Software 4.20.  
6 Electrospray ionization mass spectrometry (ESI-MS) was performed on a Proteome  
7 X-LT Q (ThermoFisher Scientific, USA). Transmission electron microscopy (TEM)  
8 observation was performed on a JEOL JEM-2100F transmission electron microscope  
9 (JEOL Co., Ltd., Tokyo, Japan) with an accelerating voltage of 200 kV.

### 10 Synthetic procedures

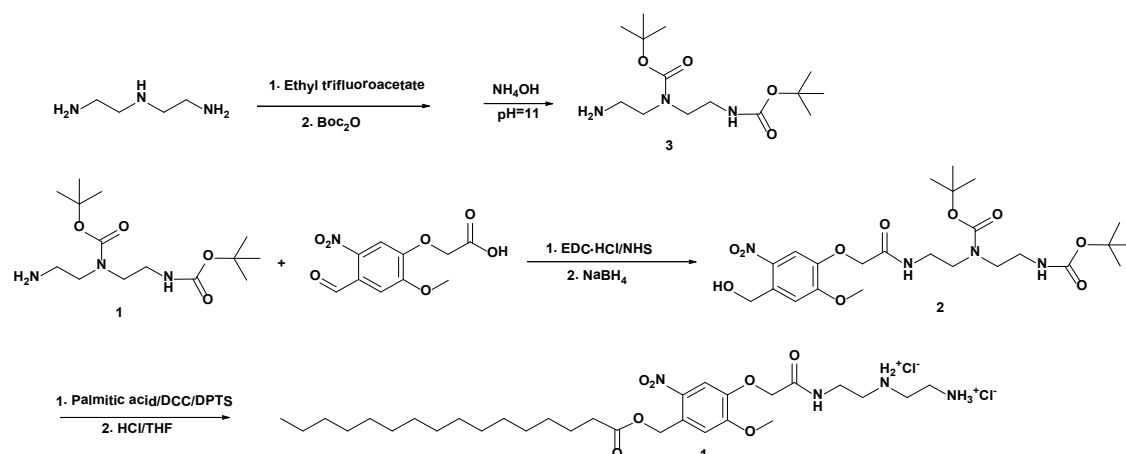

13 **Scheme S1.** Synthetic route to the UV-cleavable amphiphile **1**.

14 **Synthesis of compound 3.** Selective protection of one amino group of DETA was  
15 processed by reaction with ethyltrifluoroacetate.<sup>3</sup> DETA (3.09 g, 1.0 eqv) was  
16 dissolved in 140 mL of methanol, and the solution was cooled to  $-78^\circ\text{C}$ , then ethyl  
17 trifluoroacetate (4.23 g, 1.0 eqv) was added dropwise over a period of 30 min at -  
18  $78^\circ\text{C}$ . Stirring continued for 1 h at  $0^\circ\text{C}$  to complete the reaction. The remaining two  
19 amino groups were protected with  $\text{Boc}_2\text{O}$  without further purification.  $\text{Boc}_2\text{O}$  (16.34  
20 g, 2.5 eqv) was dissolved in 30 mL of methanol, the solution was added dropwise  
21 over a period of 30 min, and the mixture was stirred at  $0^\circ\text{C}$  for 1 h and then overnight  
22 at room temperature. After solvent removal by a rotary evaporator, the residue was

1 redissolved in DCM and purified by washing with saturated sodium bicarbonate and  
2 sodium chloride solution in sequence, and the organic phase was collected and dried  
3 with magnesium sulfate. After filtration, the filtrates were concentrated into 10 mL  
4 and then added into a 15 times greater volume of n-hexane, then kept at -20°C  
5 overnight. The intermediate was obtained by filtration as white powder. The  
6 trifluoroacetamide protecting group was then removed by adding 30 mL of 25%  
7 ammonia solution (pH of the mixture was 11), then the solution was stirred for 16 h at  
8 room temperature. After removing the solvent under reduced pressure, the residue  
9 was further purified by chromatography over silica gel (DCM/MeOH/NH<sub>4</sub>OH =  
10 100/10/1, v/v/v). The final product was obtained as yellow oil (yield: 40%). <sup>1</sup>H NMR  
11 (400 M Hz, CDCl<sub>3</sub>, ppm): δ 5.33 (s, 1H), 3.49 (t, 2H), 3.28 (t, 4H), 2.85 (t, 2H), 1.46  
12 (s, 18H). MS (ESI): m/z (relative intensity, %) = 304.10 (100) [M+H]<sup>+</sup>, 606.82 (38)  
13 [2M+H]<sup>+</sup>.

14 **Synthesis of compound 2.** Compound **3** (0.50 g, 1.0 eqv), 2-(4-formyl-2-methoxy-5-  
15 nitrophenoxy) acetic acid (0.51 g, 1.2 eqv) and NHS (0.37 g, 2.0 eqv) were dissolved  
16 in 10 mL of DMF/DCM = 1/1 (v/v), then EDC·HCl (0.61g, 2.0 eqv) in 10 mL of  
17 DCM was added dropwise over a period of 30 min at 0°C, and further stirred at room  
18 temperature for 24 h to complete the reaction. The solvents were removed under  
19 reduced pressure followed by redissolution in DCM. Then, the organic phase was  
20 washed with saturated sodium bicarbonate and sodium chloride solution in sequence,  
21 and finally dried over magnesium sulfate. After filtration, the filtrate was concentrated  
22 under reduced pressure and the product was obtained as a waxy solid (0.87 g, yield:  
23 98%).

24 The waxy solid was dissolved in dried THF (5 mL) and methanol (20 mL) and  
25 chilled to 0°C. Then, NaBH<sub>4</sub> was added to the solution in several portions. After  
26 stirring at 0°C for 10 min, the mixture was further stirred at room temperature for 6 h.  
27 10 mL of 0.1 mol/L NaOH was added to adjust the pH to 11, and the solution was  
28 further stirred overnight. After removal of the solvent by a rotation evaporator, the

1 product was dissolved in DCM and then washed with distilled water, saturated  
2 sodium bicarbonate and sodium chloride solution in sequence, and finally dried over  
3 magnesium sulfate. After filtration, the filtrate was concentrated under reduced  
4 pressure and the product was purified by chromatography over silica gel  
5 (DCM/MeOH = 98/2, v/v). The final product was obtained as a light yellow foamy  
6 solid (0.38 g, yield: 40%).  $^1\text{H}$  NMR (400 M Hz, DMSO- $d_6$ , ppm):  $\delta$  7.75 (s, 1H), 7.27  
7 (s, 1H), 5.00 (d, 2H), 4.56 (s, 2H), 4.01 (s, 3H), 3.20-3.54 (m, 8H), 1.44 (s, 18H). MS  
8 (ESI):  $m/z$  (relative intensity, %) = 542.80 (100)  $[\text{M}+\text{H}]^+$ , 1084.62 (17)  $[2\text{M}+\text{H}]^+$ ,  
9 1101.74 (35)  $[2\text{M}+\text{NH}_4]^+$ .

10 **Synthesis of amphiphile 1.** Palmitic acid (0.163 g, 1.0 eqv), compound **2** (0.380 g,  
11 1.1 eqv) and DPTS (0.094 g, 0.5 eqv) were dissolved in 5 mL of DCM, then DCC  
12 (0.263 g, 2.0 eqv) dissolved in 5 mL of DCM was added dropwise into the mixture  
13 and stirred at room temperature for 24 h. After filtration to remove the precipitate, the  
14 filtrate was diluted with more DCM and washed with a saturated sodium chloride  
15 solution. The organic layer was dried over magnesium sulfate. After filtration, the  
16 filtrate was concentrated under reduced pressure and the product was purified by  
17 chromatography over silica gel (DCM/MeOH = 98/2, v/v). The product was obtained  
18 as a light yellow solid (0.40 g, yield: 80%). The product (0.135 g) was dissolved in 5  
19 mL of anhydrous THF followed by the addition of 5 mL of a HCl/THF solution (11  
20 M) at 0°C and then stirred for 4 h. After removing the solvent under reduced pressure,  
21 the residue was washed by ether three times. The final product was obtained as a  
22 white powder (84 mg, yield: 75%).  $^1\text{H}$  NMR (400 M Hz, DMSO- $d_6$ , ppm):  $\delta$  7.73 (s,  
23 1H), 7.23 (s, 1H), 5.38 (s, 2H), 4.70 (s, 2H), 3.94 (s, 3H), 3.45 (m, 2H), 3.05-3.26 (m,  
24 6H), 2.39 (t, 2H), 1.55 (m, 2H), 1.23 (m, 24H), 0.85 (t, 3H). MS (ESI):  $m/z$  (relative  
25 intensity, %) = 581.38 (100)  $[\text{M}+\text{H}]^+$ .

26 **Preparation of UV-sensitive nanoparticles (USNPs) and USNP/siRNA complexes.**

27 USNPs were prepared by the dialysis method. In brief, 10 mg of amphiphile **1** was  
28 dissolved in 1 mL of DMSO and then added slowly into 8 mL of ultra-purified water

1 (Millipore, 18.2 M $\Omega$ , Bedford, MA) with moderate stirring at 0°C. After stirring at  
2 this temperature for 0.5 h, the solution was transferred onto a dialysis membrane  
3 (Spectra/Por<sup>®</sup>, Float-A-Lyzer, with molecular weight cut-off of 3.5 kDa) and dialyzed  
4 against ultra-purified water at room temperature to completely remove the organic  
5 solvent. The final concentration of USNPs was 0.68 mg/mL.

6 For siRNA loading, the USNP aqueous suspension was diluted to different  
7 concentrations and mixed with siRNA solution at a concentration of 1  $\mu$ M. The  
8 mixture was mixed gently by pipetting and allowed to stand at room temperature for  
9 20 min before subsequent experiments.

10 **Gel retardation assay.** USNP/siRNA complexes were prepared at different N/P  
11 ratios as described above. Then, the complexes were electrophoresed on a 1% agarose  
12 gel in Tris-borate-EDTA buffer (TBE buffer, 89 mM Tris, 89 mM boric acid, 2 mM  
13 EDTA, pH 8.3) at 110 V for 10 min, and visualized under a UV illuminator (Tanon  
14 GIS System, Shanghai, China) with ethidium bromide staining.

#### 15 **Photolysis experiments of USNPs and USNP/siRNA complexes.**

16 a. The USNP solution was diluted to 0.2 mg/mL. The solution was then subjected  
17 to UV irradiation ( $\lambda_{\text{max}} = 365 \text{ nm}$ , 10 mW/cm<sup>2</sup>). At predetermined time intervals, the  
18 solution was withdrawn and its UV-vis absorption spectroscopy was measured.

19 b. The USNP/siRNA complexes at an N/P ratio of 25 were then subjected to UV  
20 irradiation ( $\lambda_{\text{max}} = 365 \text{ nm}$ , 10 mW/cm<sup>2</sup>). At predetermined time intervals, the  
21 complexes were withdrawn and analyzed by the gel retardation assay as described  
22 above to determine the release of siRNA.

#### 23 **In vitro cell-based assays.**

24 a. *Cellular uptake.* MDA-MB-231 cells were plated in 24-well plates at a density of  
25  $5 \times 10^4$  cells/well and incubated in complete DMEM medium for 24 h. The cells were  
26 washed and treated with USNP/FAM-siRNA at a FAM-siRNA dose of 200 nM. After  
27 incubation at 37°C for 3 h or 5 h in serum-free DMEM medium, the cells were  
28 trypsinized, washed with PBS twice, resuspended in 200  $\mu$ L of PBS and subjected to

1 flow cytometric analyses on a BD FACSCalibur flow cytometer (BD Bioscience,  
2 Bedford, MA).

3 For microscopic observation, MDA-MB-231 cells, seeded onto coverslips, were  
4 incubated with USNP/FAM-siRNA at a FAM-siRNA dose of 200 nM for 3 h in  
5 serum-free DMEM medium. After receiving 0 or 300 s of UV irradiation, the cells  
6 were further incubated for 1 h and were then washed twice with PBS and fixed with  
7 4% paraformaldehyde (pH 7.4 in PBS) at room temperature for 15 min. Washed twice  
8 with PBS and then incubated in 0.1% Triton X-100 in PBS for 3 min. Staining with  
9 Alexa Fluor<sup>®</sup>568 phalloidin with PBS containing 1% BSA for 20 min. Washed twice  
10 with PBS again and added DAPI staining solution, incubate for 5 min, rinsed two  
11 times in PBS. The slides were mounted using one drop of Fluoromount<sup>™</sup> Aqueous  
12 Mounting Medium and observed with a Zeiss LSM 710 laser confocal scanning  
13 microscope imaging system (Zeiss, Heidenheim, Germany) with a 63× objective.

14 b. *siRNA transfection*. For luciferase gene silencing, stable luciferase-expressing  
15 MDA-MB-231 (MDA-MB-231-luciferase) cells were plated at a density of  $5 \times 10^4$   
16 cells/well in a 24-well plate and incubated for 24 h in complete DMEM medium.  
17 Cells were transfected with siRNA using USNP/si*Luc*, free si*Luc* and USNP/si*N.C.* at  
18 an siRNA dose of 200 nM. MDA-MB-231-luciferase cells were transfected for 3h.  
19 After replacing the media with fresh culture media, some wells were treated with UV  
20 light irradiation ( $\lambda_{\max} = 365 \text{ nm}$ ,  $10 \text{ mW/cm}^2$ ) for 300 s. The cells were harvested at  
21 48 h after transfection. For luciferase silencing efficiency analyses, cells were washed  
22 and lysed with a reporter lysis buffer (Promega, San Luis Obispo, USA) and  
23 luciferase activity was measured for 10 s on a Veritas Microplate Luminometer  
24 (Model 9100-102, Turner BioSystems, USA) using a Promega luciferase assay kit  
25 according to the standard protocol provided by the manufacturer. Light units (RLU)  
26 were normalized to protein concentrations in the cell extracts, which were measured  
27 using a bicinchoninic acid (BCA) protein assay kit (Pierce, Rockford, USA).

1           c. *MTT cytotoxicity assay.* Cells were seeded in 96-well plates at  $1 \times 10^4$  cells/well  
2 and incubated at 37°C in 5% CO<sub>2</sub> atmosphere in complete DMEM medium for 24 h.  
3 Cells were then treated with USNPs at various concentrations in complete DMEM  
4 medium for 48 h. Following that, 25 µL of MTT stock solution (5 mg/mL in PBS)  
5 was added to each well to achieve a final concentration of 1 mg/mL, with the  
6 exception of the blank wells, to which 25 µL of PBS was added. After incubation for  
7 another 2 h, 100 µL of extraction buffer (20% sodium dodecyl sulfate in 50% DMF,  
8 pH 4.7) was added to the wells and incubated overnight at 37°C. The absorbance was  
9 measured at 570 nm using a Bio-Rad 680 microplate reader (Hercules, CA). The cell  
10 viabilities were normalized to those of cells cultured in complete culture medium.

## 13 Results

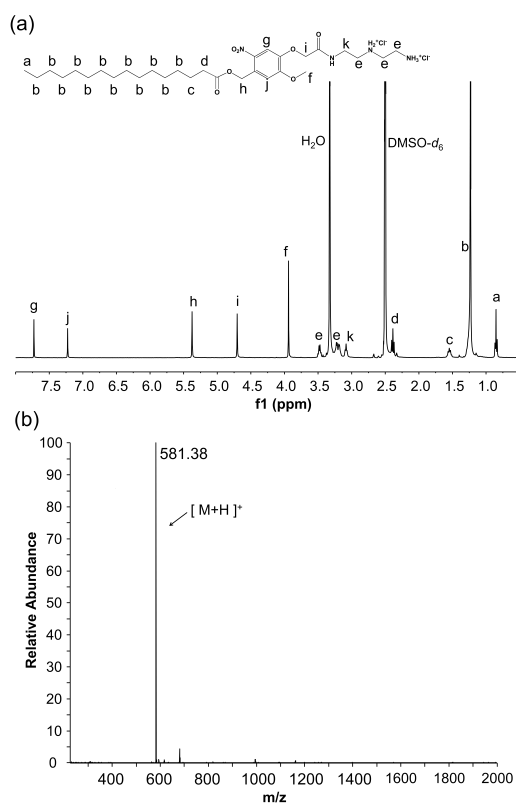

15 **Fig. S1.** (a) <sup>1</sup>H NMR (DMSO-*d*<sub>6</sub>) and (b) ESI-MS data of amphiphile 1.

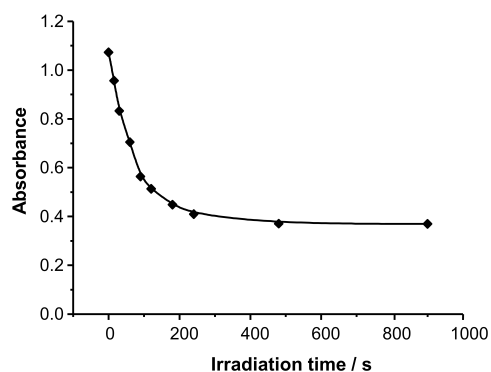

1  
2 **Fig. S2.** Time-dependent change in UV-vis absorbance at 345 nm of USNPs after UV  
3 irradiation.

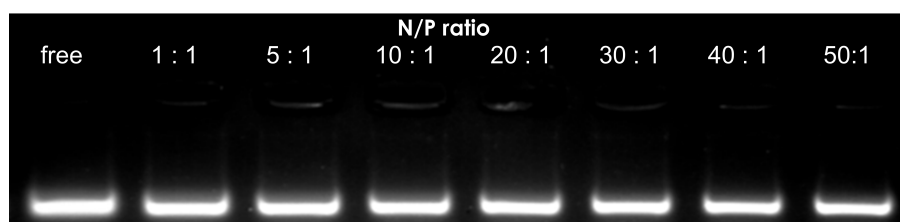

4  
5 **Fig. S3.** Agarose gel analysis of the siRNA migration of the DETA·HCl/siRNA  
6 complexes at N/P ratios varying from 1/1 to 50/1 in TAE buffer.

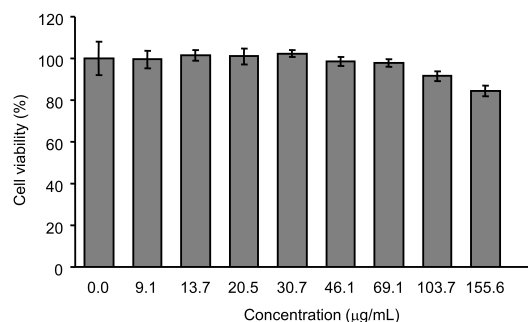

7  
8 **Fig. S4.** MTT cytotoxicity assay of USNPs at different concentrations against MDA-  
9 MB-231 cells after 48 h incubation.

## 10 References

- 11 1. S. K. Choi, T. Thomas, M. H. Li, A. Kotlyar, A. Desai and J. R. Baker, Jr., *Chem. Commun. (Camb)*, 2010, **46**, 2632-2634.
- 12 2. J. Z. Du, H. Y. Long, Y. Y. Yuan, M. M. Song, L. Chen, H. Bi and J. Wang, *Chem. Commun. (Camb)*, 2012, **48**, 1257-1259.
- 13 3. S. Srinivasachari, K. M. Fichter and T. M. Reineke, *J. Am. Chem. Soc.*, 2008, **130**, 4618-4627.
